# Supplementary material for: Predictors of return to work among patients in treatment for common mental disorders: a pre-post study
Source: BMC Public Health. 2017 Jul 18;18:27. doi: 10.1186/s12889-017-4581-4 (PMC5516307; doi:10.1186/s12889-017-4581-4)
Supplement: Supplementary file 3 — Questionnaire to therapists 2. Questions about mental health status and treatment content, answered by therapists at the end of treatment. (ZIP 43 kb) [file 12889_2017_4581_MOESM3_ESM.zip]

Archive with 2 entries (2 files):
- Additional_file3_EnglishR3.pdf
- Additional_file3_NorwegianR3.pdf
